1 Full Title: Maternal antibodies provide strain-specific protection against infection with  
2 the Lyme disease pathogen in a wild rodent

3

4 Short Title: Maternal antibodies protect rodents against Lyme disease

5

6 Andrea Gomez-Chamorro<sup>1</sup>, Vanina Heinrich<sup>1</sup>, Anouk Sarr<sup>1</sup>, Owen Roethlisberger<sup>1</sup>,

7 Dolores Genné<sup>1</sup>, Maxime Jacquet<sup>1</sup>, and Maarten J. Voordouw<sup>1,2</sup>

8

9 <sup>1</sup> Laboratoire d'Ecologie et Evolution des Parasites, Institut de Biologie, Université de  
10 Neuchâtel, Neuchâtel, Switzerland

11

12 <sup>2</sup> Department of Veterinary Microbiology, Western College of Veterinary Medicine,  
13 University of Saskatchewan, Saskatoon, Canada

14

15

16

17 **Abstract**

18

19 The vertebrate immune system can produce antibodies that protect the host against  
20 pathogens. Females can transmit antibodies to their offspring, which provide short-term  
21 protection against infection. The tick-borne bacterium *Borrelia afzelii* causes Lyme  
22 disease in Europe and consists of multiple strains that cycle between the tick vector  
23 (*Ixodes ricinus*) and vertebrate hosts such as the bank vole (*Myodes glareolus*). We used  
24 a controlled experiment to show that infected female bank voles transmit protective  
25 antibodies to their offspring that are specific for the strain of *B. afzelii*. To test the  
26 specificity of protection, the offspring were challenged with either the same strain to  
27 which the mothers had been exposed or a different strain. The maternal antibodies  
28 protected the offspring against the same strain, but not against the different strain. The  
29 offspring from the uninfected control mothers were equally susceptible to both strains.  
30 Our study shows that maternal antibodies provide strong but highly strain-specific  
31 protection against *B. afzelii* in an important rodent reservoir host. The transmission of  
32 maternal antibodies may have important consequences for the epidemiology of multiple-  
33 strain pathogens in nature.

34

35 **Keywords:** Bank vole, *Borrelia afzelii*, *Ixodes ricinus*, Lyme borreliosis, maternal  
36 antibodies, maternal effects, *Myodes glareolus*, outer surface protein C, strain-specific  
37 immunity, tick-borne pathogen

38

## 39 Author Summary

40

41 Many pathogens that cause infectious disease consist of multiple strains. In vertebrate  
42 hosts, the immune system can generate antibodies that are highly specific for different  
43 pathogen strains. Mothers can transmit these antibodies to their offspring and thereby  
44 protect them from infectious disease. To date, few studies have investigated whether this  
45 transgenerational transfer of protective antibodies is important for pathogens that cycle in  
46 wild animal populations. The tick-borne spirochete bacterium *Borrelia afzelii* causes  
47 Lyme disease in Europe and cycles between *Ixodes* ticks and wild rodent hosts, such as  
48 the bank vole (*Myodes glareolus*). The purpose of our study was to test whether female  
49 bank voles infected with *B. afzelii* transmit antibodies to their offspring that protect them  
50 from an infected tick bite. Our study found that infected mothers do transmit antibodies,  
51 but the offspring were only protected against the strain of *B. afzelii* to which their  
52 mothers had been exposed and not to a different strain (i.e. protection was highly strain-  
53 specific). The broader implications of our study is that the transfer of protective  
54 antibodies between generations in the vertebrate host population could be important for  
55 organizing the community of pathogen strains that circulate in nature.

56

57

## 58 **Introduction**

59 Parents transmit to their offspring more than just their genes [1]. Mothers transfer  
60 their environmental experience and phenotype to their offspring [2] and these maternal  
61 effects can influence offspring phenotype and fitness [3]. In vertebrate hosts, an  
62 important maternal effect is the transmission of antibodies from mothers to offspring [4].  
63 Young vertebrates are susceptible to infectious diseases while their immune systems are  
64 developing [4]. Maternally transmitted antibodies can protect the offspring against  
65 pathogens until they can start to produce their own antibodies [4]. The transgenerational  
66 transmission of acquired immunity can have important consequences for the  
67 epidemiology of the pathogen [1]. For example, maternal antibodies were shown to  
68 influence the epidemiology of Puumala virus in wild bank vole populations [5]. Despite  
69 its potential importance in nature, the transgenerational transfer of acquired immunity has  
70 not received much attention in the epidemiology of zoonotic diseases [1,5].

71 Maternal antibodies may be particularly important for the epidemiology of  
72 pathogens that consist of multiple genetically distinct strains that circulate in the host  
73 population at the same time. These strains can be distinguished by the acquired immune  
74 system of the vertebrate host resulting in the development of strain-specific antibody  
75 responses. Theoretical models have shown that strain-specific antibodies play a critical  
76 role in shaping the epidemiology and population structure of pathogen strains [6,7,8,9].  
77 Maternal antibodies are expected to be particularly important in systems where the  
78 vertebrate host is short-lived and has multiple generations within the transmission season  
79 of the pathogen. In such systems, a pathogen strain that is common in the maternal

80 generation would be at a selective disadvantage in the offspring generation due to the  
81 maternal transmission of strain-specific antibodies against this common strain.

82 Tick-borne spirochete bacteria belonging to the *Borrelia burgdorferi* sensu lato (sl)  
83 genospecies complex are the etiological agents of Lyme borreliosis [10,11]. *B.*  
84 *burgdorferi* sl is a good model system for studying whether maternally transmitted  
85 antibodies can influence strain-specific infection success. The populations of *B.*  
86 *burgdorferi* sl consist of multiple strains that circulate between *Ixodes* ticks and  
87 vertebrate hosts such as rodents and birds [12,13,14,15,16]. Immature *Ixodes* ticks search  
88 for a blood meal from spring until early autumn, and the transmission of *B. burgdorferi* sl  
89 therefore coincides with the reproduction and population expansion of their vertebrate  
90 hosts [11,17]. There is no vertical transmission of *B. burgdorferi* sl in either the tick [18]  
91 or the vertebrate host [19,20]. In nature, vertebrate hosts develop a strong antibody  
92 response against *B. burgdorferi* sl [19,20], and infection studies have shown that this  
93 antibody response is strain-specific [21,22,23]. Previous field studies on a marine Lyme  
94 borreliosis system found that infected female seabirds transmit antibodies to their  
95 offspring [24,25]. However, to date no one has provided experimental evidence that  
96 maternal antibodies protect offspring against infection with *B. burgdorferi* sl and that this  
97 protection is strain-specific.

98 In this study, we used *Borrelia afzelii*, which is the most common cause of Lyme  
99 borreliosis in Europe [26], its tick vector *I. ricinus*, and the bank vole (*Myodes*  
100 *glareolus*), which is an important reservoir host for both *B. afzelii* and *I. ricinus*  
101 [27,28,29]. The purpose of this study was to test (1) whether female bank voles that were  
102 experimentally infected with *B. afzelii* transmit maternal antibodies to their offspring, (2)

103 whether maternal antibodies can protect bank vole offspring against *B. afzelii*-infected *I.*  
104 *ricinus* ticks, and (3) whether this maternal antibody protection is specific for the strain of  
105 *B. afzelii*.

106

## 107 **Materials and Methods**

### 108 **Bank voles, *Ixodes ricinus* ticks and *Borrelia afzelii***

109 In 2014, we used field-captured bank voles to establish a breeding colony at the  
110 University of Neuchâtel [30]. The bank voles used in this study were from the third and  
111 fourth lab-born generation and are therefore free from tick-borne pathogens. The *I.*  
112 *ricinus* ticks came from a laboratory colony established in 1978 at the University of  
113 Neuchâtel. During the study, the bank voles were maintained in individual cages and  
114 were given food and water *ad libitum*. Bank voles were experimentally infected via tick  
115 bite with one of two isolates of *B. afzelii*: NE4049 and Fin-Jyv-A3. These two isolates  
116 carry two different *ospC* alleles, A10 and A3, which code for two different variants of  
117 outer surface protein C (OspC), which is an immunodominant antigen. We have  
118 previously shown that immunization with recombinant OspC A10 and A3 induces strain-  
119 specific protective antibody responses in laboratory mice [21]. NE4049 was isolated from  
120 an *I. ricinus* tick in Switzerland, has multi-locus sequence type (MLST) 679, and strain  
121 ID number 1887 in the *Borrelia* MLST database. Fin-Jyv-A3 was isolated from a bank  
122 vole in Finland, has MSLT 676, and strain ID number 1961 in the *Borrelia* MLST  
123 database. Our previous work has shown that these two strains are highly infectious to  
124 both rodents and *I. ricinus* ticks [21,31,32,33].

125

## 126 **Ethics statement and animal experimentation permits**

127 This study followed the Swiss legislation on animal experimentation. The  
128 commission that is part of the ‘Service de la Consommation et des Affaires Vétérinaires  
129 (SCAV)’ of the canton of Vaud, Switzerland evaluated and approved the ethics of this  
130 study. The SCAV of the canton of Neuchâtel, Switzerland issued the animal  
131 experimentation permits for the study (NE02-2018) and for the maintenance of the *I.*  
132 *ricinus* tick colony on vertebrate hosts at the University of Neuchâtel (NE05-2014).

133

## 134 **Creation of *I. ricinus* nymphs infected with *B. afzelii***

135 The nymphs used for the experimental infections were created as follows.  
136 BALB/c mice were infected with *B. afzelii* strain NE4049 or Fin-Jyv-A3 via tick bite. At  
137 4 weeks post-infection (PI), the mice were infested with larval ticks from our *I. ricinus*  
138 colony. The engorged larval ticks were stored in individual tubes and allowed to molt  
139 into nymphs. A random sample of nymphs was tested to determine the infection  
140 prevalence, which was 77.9% (67 infected nymphs/ 86 total nymphs) for NE4049 and  
141 91.8% (67 infected nymphs/ 73 total nymphs) for Fin-Jyv-A3. Larval *I. ricinus* ticks were  
142 also fed on uninfected BALB/c mice to create uninfected control nymphs.

143

## 144 **Infectious challenge of the bank vole mothers**

145 Five-week-old female bank voles were randomly assigned to one of two  
146 experimental groups: control (n = 9) and infected with *B. afzelii* strain NE4049 (n = 11).  
147 Each female in the control group was infested with 4 uninfected nymphs; each female in  
148 the infected group was infested with 4 nymphs infected with strain NE4049. At 5 weeks

149 PI, a blood sample and an ear tissue biopsy were taken from each female to confirm their  
150 infection status. Females were coupled with different males at 2 and 6 weeks PI, and  
151 offspring from the first successful coupling was used in the present study. Seven control  
152 mothers and 6 *B. afzelii*-infected mothers produced a total of 22 offspring and 20  
153 offspring, respectively (Table S1). At 18 weeks PI, the mothers were sacrificed using  
154 CO<sub>2</sub> asphyxiation and the following organs were aseptically dissected: bladder, left ear,  
155 right ear, left rear joint, and right rear joint. The tissue samples were stored at -80°C until  
156 further analysis.

157

### 158 **Rearing the bank vole offspring**

159 At 21 days post-birth (PB), offspring were separated from their mothers and  
160 moved to individual cages. At 34 days PB, a blood sample and an ear tissue biopsy were  
161 taken from each of the 42 offspring. The blood samples were tested for maternal IgG  
162 antibodies against *B. afzelii*. The ear tissue biopsies were tested to confirm that there was  
163 no mother-to-offspring transmission of *B. afzelii*. As the offspring from the uninfected  
164 mothers and the infected mothers are expected to test negative and positive for maternal  
165 antibodies (MatAb), they will hereafter be referred to as the MatAb- and MatAb+  
166 offspring, respectively.

167 At 35 days PB, the offspring were challenged with *I. ricinus* nymphs that were  
168 infected with either strain NE4049 or strain Fin-Jyv-A3 (see below).

169

### 170 **Infectious challenge of the bank vole offspring**



171 To test whether maternal antibodies provide strain-specific protection, the MatAb-  
172 offspring (n = 22) and the MatAb+ offspring (n = 20) were challenged via tick bite with  
173 strain NE4049 or strain Fin-Jyv-A3. Offspring were assigned to balance sample sizes and  
174 family effects among the four combinations of MatAb status and challenge strain, which  
175 were as follows: MatAb-/NE4049 (n = 9), MatAb-/Fin-Jyv-A3 (n = 11),  
176 MatAb+/NE4049 (n = 10), and MatAb+/Fin-Jyv-A3 (n = 10). The remaining 2 MatAb-  
177 offspring were challenged with uninfected nymphs as controls. The infectious tick bite  
178 challenge for the offspring was the same as for the mothers. Five-week-old offspring  
179 were challenged with 4 nymphs infected with either strain NE4049 or strain Fin-Jyv-A3.  
180 The engorged nymphs were collected and tested for *B. afzelii* to confirm that each  
181 offspring had been infested with at least one infected nymph (Tables S3 and S4). At 5  
182 weeks PI, a second blood sample and a second ear tissue biopsy were taken from each of  
183 the 42 offspring to confirm their infection status. At 10 weeks PI, the offspring were  
184 sacrificed using CO<sub>2</sub> asphyxiation and the following organs were aseptically dissected:  
185 bladder, left ear, right ear, left rear joint, right rear joint, ventral skin, and dorsal skin.  
186 Tissue samples (20–25 mg) from the bladder, left ear, and left rear joint were tested for  
187 the presence of *B. afzelii* using qPCR (see below). Tissue samples from the right ear,  
188 right rear joint, ventral skin, and dorsal skin were cultured in BSK-II medium (see below).

189

#### 190 **Infection status of the bank voles**

191 A bank vole was considered as having been successfully challenged with *B.*  
192 *afzelii* if at least one engorged *B. afzelii*-infected nymph was collected and/or if it  
193 developed a systemic infection following the infectious tick challenge. A bank vole was

194 defined as having a systemic infection with *B. afzelii* if it tested positive for more than  
195 one of seven criteria: (1) presence of *B. afzelii*-specific IgG antibodies, (2) presence of  
196 OspC-specific antibodies, detection of *B. afzelii* spirochetes in (3) ear biopsy at 35 days  
197 PI, (4) bladder at 70 days PI, (5) left ear at 70 days PI, (6) left rear joint at 70 days PI, and  
198 (7) culture of live spirochetes from dissected organs at 70 days PI.

199

### 200 ***Borrelia*-specific qPCR and *ospC*-specific qPCR**

201 The *B. afzelii* infection status of the engorged nymphs and the bank vole tissue  
202 samples was tested using qPCR. The DNA was extracted from the engorged nymphs and  
203 the bank vole tissue samples as previously described [30]. The qPCR assay targets a 132  
204 bp fragment of the *flagellin* gene of *B. burgdorferi* sl and was performed as previously  
205 described [30]. The strain identity of the engorged nymphs and the offspring ear biopsies  
206 was confirmed using a strain-specific qPCR [33]. This qPCR targets a 143 bp fragment of  
207 the *ospC* gene and uses two different probes that detect either *ospC* allele A3 or *ospC*  
208 allele A10 and was performed as previously described [33].

209

### 210 ***Borrelia*-specific ELISA and OspC-specific ELISA**

211 The serum samples of the voles were tested for the presence of *B. afzelii*-specific  
212 IgG antibodies using a commercial ELISA assay as previously described [30]. The  
213 maternally transmitted OspC-specific IgG antibody response in the offspring before the  
214 infectious challenge (34 days PB) was measured using a homemade ELISA with  
215 recombinant OspC (rOspC) proteins A3 and A10 [21]. 96-well tissue culture plates were  
216 coated overnight at 4°C with rOspC proteins A3 and A10 (1 µg of protein per well).

217 Wells were washed three times with PBS-Tween 0.1% between each step. The plate was  
218 incubated with a BSA 2% blocking solution for 2 hours, followed by the bank vole serum  
219 samples (diluted 1:100 in 1x PBS) for 45 minutes, and the secondary antibody for 45  
220 minutes (diluted 1:5000 in 1x PBS). The secondary antibody was a goat anti-*Mus*  
221 *musculus* IgG conjugated to horseradish peroxidase. After adding 100 µl of TMB, we  
222 measured the absorbance at 652 nm every 2 minutes for one hour using a plate reader  
223 (Synergy HT, Multi-detection plate reader, Bio-Tek, United States). The strength of the  
224 IgG antibody response against the rOspC antigens was determined by integrating the area  
225 under the absorbance versus time curve.

226

#### 227 **Culture of *B. afzelii* spirochetes from bank vole tissues**

228 To demonstrate that the bank vole offspring were infected with live *B. afzelii*,  
229 tissue biopsies were cultured in BSK-II media. Tissue biopsies from the skin (ventral skin  
230 and/or dorsal skin), right ear, and right rear joint were placed in individual tubes for each  
231 of the 42 offspring. The culture tubes were kept in an incubator at 34°C and were  
232 screened for live spirochetes over a period of 4 weeks using a dark field microscope.

233

#### 234 **Statistical analysis**

235 All statistical analyses were done in R version 1.0.143 (R Development Core  
236 Team 2015-08-14). The IgG antibody response is measured in absorbance units and was  
237 log<sub>10</sub>-transformed to improve the normality of the residuals. All means are reported with  
238 their 95% confidence intervals (95% CI).

239

## 240 **Maternal infection status and maternal antibody transmission**

241 To test whether the mother bank voles developed an IgG antibody response  
242 against *B. afzelii* at 5 weeks PI, we compared this variable (log<sub>10</sub>-transformed) between  
243 infected mothers and uninfected mothers using an independent two samples t-test. To test  
244 whether the pre-infection blood sample (at 34 days PB) of the offspring contained  
245 maternally transmitted *B. afzelii*-specific IgG antibodies, we compared this variable  
246 (log<sub>10</sub>-transformed) between the MatAb- offspring and the MatAb+ offspring using an  
247 independent two samples t-test.

248 The specificity of the maternal antibodies in the pre-infection blood sample (at 34  
249 days PB) of the offspring was measured as the strength of the IgG antibody response  
250 against OspC antigens A3 and A10. We calculated an OspC A10 specificity ratio for each  
251 offspring by dividing the IgG antibody response against rOspC A10 by the IgG antibody  
252 response against rOspC A3. We compared the log<sub>10</sub>-transformed OspC A10 specificity  
253 ratio between the MatAb+ offspring and the MatAb- offspring using an independent two  
254 samples t-test.

255

## 256 **Maternal antibody protection and strain specificity**

257 We tested whether the maternal antibodies protected offspring against infection  
258 with *B. afzelii* and whether this protection was strain-specific. Offspring were classified  
259 as being uninfected (0) or infected (1) depending on the 7 infection criteria. Offspring  
260 infection status was modeled using generalized linear models (GLMs) with binomial  
261 errors. The two explanatory factors included offspring maternal antibody status (2 levels:  
262 MatAb+ and MatAb-) and offspring challenge strain (2 levels: NE4049, Fin-Jyv-A3), and

263 their interaction. Statistical significance of explanatory factors was determined using log-  
264 likelihood ratio tests that compared the change in deviance between nested models to a  
265 Chi-square distribution.

266

## 267 **Results**

### 268 **Maternal infection status and maternal antibody transmission**

269 The mean *B. afzelii*-specific IgG antibody response of the infected females (mean  
270 = 3811, 95% CI = 2692–5395) was 7.4 times higher than the uninfected females (mean =  
271 512, 95% CI = 371–706), and this difference was significant (Figure S1;  $t = -9.335$ ,  $df =$   
272 11,  $p < 0.001$ ). This result shows that infected mothers developed a strong IgG antibody  
273 response against the *B. afzelii* infection. For the offspring blood sample that was taken  
274 prior to the infectious challenge, the mean *B. afzelii*-specific IgG antibody response for  
275 the MatAb+ offspring (mean = 815, 95% CI = 731–906) was 1.6 times higher than the  
276 MatAb- offspring (mean = 511, 95% CI = 459–566) and this difference was significant  
277 (Figure 1;  $t = -5.589$ ,  $df = 39$ ,  $p < 0.001$ ). This result shows that the MatAb+ offspring  
278 received maternal antibodies from their *B. afzelii*-infected mothers. The OspC A10  
279 specificity ratio of the maternal IgG antibody response was 3.07 times higher in the  
280 MatAb+ offspring than the MatAb- offspring, and this difference was significant (Figure  
281 S3;  $t = -10.015$ ,  $df = 39$ ,  $p < 0.001$ ). This result shows that the maternal IgG antibodies in  
282 the MatAb+ offspring reacted more strongly with rOspC A10 than rOspC A3 compared  
283 to the MatAb1 offspring.

284

### 285 **Offspring infection status following the infectious challenge**

286 Before the infectious challenge (34 days PB), the ear tissue biopsies of all  
287 offspring tested negative for *B. afzelii* indicating that there was no mother-offspring  
288 transmission of the pathogen. The infectious challenge was successful: we collected at  
289 least one *B. afzelii*-infected nymph from 38 of the 40 offspring that were challenged with  
290 infected ticks. The 2 offspring for which no infected ticks were collected were excluded  
291 from the analysis (Tables S3 and S4). The final sample sizes were therefore 8, 11, 9, and  
292 10 offspring for groups MatAb-/NE4049, MatAb-/Fin-Jyv-A3, MatAb+/NE4049, and  
293 MatAb+/Fin-Jyv-A3, respectively. The infection status of the offspring was  
294 unambiguous; infected offspring tested positive for at least 5 of the 7 infection criteria. In  
295 contrast, almost all of the uninfected offspring tested negative for all of the 7 infection  
296 criteria; one individual tested positive for 1 infection criterion (Tables S3 and S4).

297 The analysis of offspring infection status found a highly significant interaction  
298 between maternal antibody status and challenge strain (GLM:  $\Delta$  df = 1,  $\Delta$   $\chi^2$  = 71.659, p  
299 < 0.001). All of the MatAb- offspring became infected regardless of whether they were  
300 challenged with strain NE4049 (100.0% = 8 infected /8 total) or strain Fin-Jyv-A3 (100.0%  
301 = 11 infected /11 total). This result shows that both strains were highly infectious to naive  
302 offspring. The MatAb+ offspring were perfectly protected against strain NE4049 (0.0% =  
303 0 infected /9 total), but almost completely susceptible to strain Fin-Jyv-A3 (90.0% = 9  
304 infected /10 total), and this difference was significant ( $\chi^2$  = 11.992, df = 1, p < 0.001).  
305 This result shows that maternal antibodies only protected offspring against the strain with  
306 which the mother had been infected.

307

308 **Discussion**

309

310           **Maternal antibodies are protective and strain-specific:** Our study provides the  
311 first experimental evidence that maternally transmitted antibodies protect offspring  
312 against infection with *B. burgdorferi* s.l in an important reservoir host. Earlier studies on a  
313 marine Lyme borreliosis system that consists of *B. garinii* and sea birds had shown a  
314 positive correlation in antibody concentrations between mothers and their chicks [24].  
315 However, in this sea bird system there was no proof that the maternally transmitted  
316 antibodies actually protected the chicks against infection with *B. garinii*. Our study also  
317 shows that the protection afforded by the maternal antibodies is highly strain-specific.  
318 Offspring from infected mothers were 100% protected against the *B. afzelii* strain to  
319 which their mothers had been exposed, but they were highly susceptible to a *B. afzelii*  
320 strain to which their mothers had not been exposed. Numerous studies have shown that  
321 local populations of *B. burgdorferi* s.l contain community of strains that circulate in the  
322 same reservoir host and tick populations [12,13,14,15,16]. Theoretical models have  
323 shown that strain-specific antibody responses are important for structuring pathogen  
324 populations into communities of antigenically distinct strains [6,7,8,9]. Numerous Lyme  
325 disease researchers have suggested that the host immune response against the  
326 immunodominant OspC antigen could drive the population structure of *B. burgdorferi* s.l  
327 pathogens [11,12,14,34,35]. The results from our study suggest that the trans-  
328 generational transfer of antibodies in vertebrate reservoir hosts could play a critical role  
329 in controlling the epidemiology of multi-strain vector-borne pathogens.

330           **Duration of protection of maternal antibodies:** Newborn rodents can take  
331 several weeks to develop active immunity [4]. During this period, maternally transmitted

332 antibodies can protect the offspring for 6 to 10 weeks [4,36]. In the present study, we  
333 showed that maternally transmitted antibodies protected bank vole offspring at 5 weeks  
334 post-birth. A previous study on bank voles found that maternally transmitted antibodies  
335 against Puumala hantavirus can protect offspring for a period of two and a half months  
336 post-birth [36]. Numerous studies on wild rodents (including bank voles) have shown that  
337 sub-adults have a lower prevalence of infection with *B. burgdorferi* sl than adults  
338 [19,20,29,37]. The common explanation is that adults have had more time than sub-adults  
339 to be exposed to infected ticks. Our study suggests that maternal antibodies may also help  
340 to reduce the prevalence of *B. burgdorferi* sl in sub-adult rodents.

#### 341 **Importance of maternal antibodies for the ecology of Lyme borreliosis:**

342 Previous studies on wild bank vole populations in Finland have shown that maternally  
343 transmitted antibodies are important for the epidemiology of the Puumala Hantavirus [5].  
344 In contrast to our study, these studies did not investigate strain-specific antibody  
345 responses because there is limited antigenic variation in the Puumala Hantavirus [5]. The  
346 ecology of Lyme borreliosis suggests that maternally transmitted antibodies could be  
347 important for controlling the epidemiology of *B. burgdorferi* sl pathogens in nature. The  
348 search for a blood meal by the tick vector, the resultant transmission of *B. burgdorferi* sl,  
349 and the reproduction of the rodent host all occur at the same time of the year [11,17].  
350 *Ixodes* nymphs, which transmit *B. burgdorferi* sl, search for reservoir hosts from the  
351 spring to the autumn [38,39]. Over the course of the transmission season, the reservoir  
352 host population builds up acquired immunity to *B. burgdorferi* sl [19,20]. For example, a  
353 study on a population of white-footed mice (*Peromyscus leucopus*) in Connecticut found  
354 that 93% of all mice were seropositive for *B. burgdorferi* by the end of August [20]. This



355 observation suggests that at the end of the summer, the majority female rodents are  
356 transferring protective antibodies to their offspring. The phenology of nymph questing  
357 and *B. burgdorferi* sl transmission coincides with rodent reproduction. For example, the  
358 bank vole breeding season is from the spring until early autumn with seasonal  
359 fluctuations [17]. In summary, the seasonal buildup of acquired immunity in mothers  
360 suggests that there would be high transmission of maternal antibodies to offspring, which  
361 would protect offspring from infection with *B. burgdorferi* sl (see below).

362       **OspC and the mechanism of strain-specific immunity:** Our study also showed  
363 that the protection of the maternal antibodies was highly strain-specific and most likely  
364 mediated by the OspC antigen. The *ospC* is the most polymorphic gene in the genome of  
365 *B. burgdorferi* sl [12,13,14] and encodes for outer surface protein C (OspC). OspC is  
366 critical for the establishment of infection in the vertebrate host [40,41,42]. Studies have  
367 shown that OspC induces a strain-specific antibody response that protects rodents from  
368 tick bite [21,22,23,43]. The two *ospC* alleles used in this study (A3 and A10) have a  
369 genetic distance of 23.19% and an amino acid distance of 62.57%. We had previously  
370 shown in a vaccination trial that rOspC proteins A3 and A10 induce strain-specific  
371 protection against strains of *B. afzelii* carrying the corresponding *ospC* alleles [21]. In the  
372 present study, we showed that maternal infection with *B. afzelii* strain NE4049, which  
373 carries *ospC* allele A10, resulted in the presence of IgG antibodies in the offspring that  
374 reacted much more strongly with rOspC A10 than rOspC A3. Taken together, our results  
375 suggest that maternal antibodies are highly strain-specific and that OspC is a critical  
376 antigen for this specificity.

377           **Importance of maternal antibodies for population structure of *ospC* type**  
378   **strains:** Long-term field studies on *B. afzelii* in tick populations and rodent populations  
379   have shown that the community of strains carrying different *ospC* major groups (oMGs)  
380   was stable over more than a decade, with some strains an order of magnitude more  
381   common than others [15,16]. Strains that were common in the field had higher rates of  
382   host-to-tick transmission in laboratory studies [15,44]. An important question is why  
383   these high transmission strains do not eliminate the low transmission strains. The *ospC*  
384   polymorphism is maintained by balancing selection and two alternative hypotheses,  
385   multiple niche polymorphism (MNP) and negative frequency-dependent selection  
386   (NFDS), have been proposed [12,13,35]. Under MNP, the different oMG genotypes are  
387   adapted to different host species and the frequency of each oMG genotype depends on the  
388   abundance of their respective host species [13,35]. Under NFDS, the immune system of  
389   the vertebrate host is responsible for controlling the frequencies of the different oMG  
390   types. This model suggests that the host immune system is more efficient at targeting the  
391   more common oMG strains, and that the rare oMG strains therefore have a selective  
392   advantage [12,14,45]. The present study suggests that balancing selection could result  
393   from the maternal transfer of *OspC*-specific antibodies. Under this mechanism, acquired  
394   immunity in the mothers would build up faster against the common oMG strains than the  
395   rare oMG strains, and the offspring would be more likely to have protective maternal  
396   antibodies against the former than the latter. The seasonal trans-generational transmission  
397   of strain-specific acquired immunity could prevent the common oMG strains from  
398   eliminating the rare oMG strains.  
399

## 400 **Conclusions**

401 We used experimental infections with a common Lyme disease pathogen (*B.*  
402 *afzelii*) and its natural reservoir host (the bank vole) to show that females transmit  
403 maternal antibodies to their offspring. These maternal antibodies were completely  
404 protective against the strain that the mother had encountered, but provided no protection  
405 against a different strain. The immunodominant OspC antigen appears to mediate this  
406 strain-specific maternal antibody response. The inter-generational transfer of protective  
407 strain-specific antibodies could have important implications for the epidemiology of  
408 multiple strain pathogen populations in the field.

409 Future studies should investigate whether maternal antibodies are important for  
410 protecting other important reservoir host species against *B. burgdorferi* s.l, such as the  
411 white-footed mouse (*Peromyscus leucopus*) in North America. They should investigate  
412 the duration of protection, the mechanism of antibody transfer (e.g. via the placenta or via  
413 milk), and whether females infected with multiple strains transmit antibody responses  
414 that are protective against each of those strains. Additional studies are needed to test  
415 whether OspC is solely responsible for the strain-specific immunity or whether other *B.*  
416 *burgdorferi* s.l antigens are involved. Finally, theoretical models are needed to investigate  
417 how the maternal transfer of antibodies in the reservoir host population would influence  
418 the epidemiology of this multi-strain tick-borne pathogen.

419

## 420 **Acknowledgements**

421           This work was supported by a grant from the Swiss National Science Foundation  
422 to Maarten Voordouw (FN 31003A\_141153). We thank Jacob Koella for advice on the  
423 experimental design.

424

425   **Author contributions**

426           A.G.-C. and M.J.V designed the study. A.G.-C., V.H, A.S and O.R. performed the  
427 experimental infections. A.G.-C., A.S and O.R. performed the molecular work. A.G.-C.,  
428 A.S. and D.G. created the *B. afzelii*-infected nymphs. M.J. created the recombinant  
429 proteins. A.G.-C. analysed the data. A.G.-C. and M.J.V wrote the manuscript. All authors  
430 read and approved the final version of the manuscript.

431

432   Competing interests: The authors declare no competing of interest.

433

434

## 435 **References**

- 436 1. Boulinier T, Staszewski V Maternal transfer of antibodies: raising immuno-ecology  
437 issues. *Trends Ecol Evol* 2008; 23: 282-288.
- 438 2. Mousseau TA, Fox CW Maternal effects as adaptations. Oxford, UK: Oxford  
439 University Press; 1998.
- 440 3. Agrawal AA Ecology - Phenotypic plasticity in the interactions and evolution of  
441 species. *Science* 2001; 294: 321-326.
- 442 4. Grindstaff JL, Brodie ED, Ketterson ED Immune function across generations:  
443 integrating mechanism and evolutionary process in maternal antibody  
444 transmission. *Proceedings of the Royal Society B-Biological Sciences* 2003; 270:  
445 2309-2319.
- 446 5. Kallio ER, Begon M, Henttonen H, Koskela E, Mappes T, Vaehri A, et al. Hantavirus  
447 infections in fluctuating host populations: the role of maternal antibodies. *Proc*  
448 *Biol Sci* 2010; 277: 3783-3791.
- 449 6. Gupta S, Ferguson N, Anderson R Chaos, persistence, and evolution of strain structure  
450 in antigenically diverse infectious agents. *Science* 1998; 280: 912-915.
- 451 7. Gupta S, Maiden MCJ, Feavers IM, Nee S, May RM, Anderson RM The maintenance  
452 of strain structure in populations of recombining infectious agents. *Nature*  
453 *Medicine* 1996; 2: 437-442.
- 454 8. Gupta S, Anderson RM Population structure of pathogens: The role of immune  
455 selection. *Parasitology Today* 1999; 15: 497-501.
- 456 9. Cobey S, Lipsitch M Niche and neutral effects of acquired immunity permit  
457 coexistence of pneumococcal serotypes. *Science* 2012; 335: 1376-1380.
- 458 10. Stanek G, Reiter M The expanding Lyme *Borrelia* complex-clinical significance of  
459 genomic species? *Clinical Microbiology and Infection* 2011; 17: 487-493.
- 460 11. Kurtenbach K, Hanincova K, Tsao JI, Margos G, Fish D, Ogden NH Fundamental  
461 processes in the evolutionary ecology of Lyme borreliosis. *Nature Reviews*  
462 *Microbiology* 2006; 4: 660-669.
- 463 12. Barbour AG, Travinsky B Evolution and distribution of the *ospC* gene, a transferable  
464 serotype determinant of *Borrelia burgdorferi*. *Mbio* 2010; 1.
- 465 13. Brisson D, Dykhuizen DE *ospC* diversity in *Borrelia burgdorferi*: different hosts are  
466 different niches. *Genetics* 2004; 168: 713-722.

- 467 14. Wang IN, Dykhuizen DE, Qiu W, Dunn JJ, Bosler EM, Luft BJ Genetic diversity of  
468 *ospC* in a local population of *Borrelia burgdorferi* sensu stricto. Genetics 1999;  
469 151: 15-30.
- 470 15. Durand J, Jacquet M, Rais O, Gern L, Voordouw MJ Fitness estimates from  
471 experimental infections predict the long-term strain structure of a vector-borne  
472 pathogen in the field. Scientific Reports 2017; 7: 1851.
- 473 16. Raberg L, Hagstrom A, Andersson M, Bartkova S, Scherman K, Strandh M, et al.  
474 Evolution of antigenic diversity in the tick-transmitted bacterium *Borrelia afzelii*:  
475 a role for host specialization? Journal of Evolutionary Biology 2017; 30: 1034-  
476 1041.
- 477 17. Tersago K, Schreurs A, Linard C, Verhagen R, Van Dongen S, Leirs H Population,  
478 environmental, and community effects on local bank vole (*Myodes glareolus*)  
479 Puumala virus infection in an area with low human incidence. Vector-Borne and  
480 Zoonotic Diseases 2008; 8: 235-244.
- 481 18. Richter D, Debski A, Hubalek Z, Matuschka FR Absence of Lyme disease  
482 spirochetes in larval *Ixodes ricinus* ticks. Vector-Borne and Zoonotic Diseases  
483 2012; 12: 21-27.
- 484 19. Hofmeister EK, Ellis BA, Glass GE, Childs JE Longitudinal study of infection with  
485 *Borrelia burgdorferi* in a population of *Peromyscus leucopus* at a Lyme disease-  
486 enzootic site in Maryland. American Journal of Tropical Medicine and Hygiene  
487 1999; 60: 589-609.
- 488 20. Bunikis J, Tsao J, Luke CJ, Luna MG, Fish D, Barbour AG *Borrelia burgdorferi*  
489 infection in a natural population of *Peromyscus leucopus* mice: a longitudinal  
490 study in an area where Lyme borreliosis is highly endemic. Journal of Infectious  
491 Diseases 2004; 189: 1515-1523.
- 492 21. Jacquet M, Durand J, Rais O, Voordouw MJ Cross-reactive acquired immunity  
493 influences transmission success of the Lyme disease pathogen, *Borrelia afzelii*.  
494 Infection Genetics and Evolution 2015; 36: 131-140.
- 495 22. Probert WS, Crawford M, Cadiz RB, LeFebvre RB Immunization with outer surface  
496 protein (Osp) A, but not OspC, provides cross-protection of mice challenged with  
497 North American isolates of *Borrelia burgdorferi*. Journal of Infectious Diseases  
498 1997; 175: 400-405.
- 499 23. Bhatia B, Hillman C, Carracoi V, Cheff BN, Tilly K, Rosa PA Infection history of the  
500 blood-meal host dictates pathogenic potential of the Lyme disease spirochete  
501 within the feeding tick vector. PLOS Pathogens 2018; 14: e1006959.
- 502 24. Gasparini J, McCoy KD, Tveraa T, Boulinier T Related concentrations of specific  
503 immunoglobulins against the Lyme disease agent *Borrelia burgdorferi* sensu lato

- 504 in eggs, young and adults of the kittiwake (*Rissa tridactyla*). Ecology Letters  
505 2002; 5: 519-524.
- 506 25. Gasparini J, McCoy KD, Haussy C, Tveraa T, Boulinier T Induced maternal response  
507 to the Lyme disease spirochaete *Borrelia burgdorferi* sensu lato in a colonial  
508 seabird, the kittiwake *Rissa tridactyla*. Proceedings of the Royal Society B-  
509 Biological Sciences 2001; 268: 647-650.
- 510 26. van Duijvendijk G, Sprong H, Takken W Multi-trophic interactions driving the  
511 transmission cycle of *Borrelia afzelii* between *Ixodes ricinus* and rodents: a  
512 review. Parasites & Vectors 2015; 8: 1-11.
- 513 27. Talleklint L, Jaenson TGT Transmission of *Borrelia burgdorferi* s.l. from mammal  
514 reservoirs to the primary vector of Lyme borreliosis, *Ixodes ricinus* (Acari,  
515 Ixodidae), in Sweden. Journal of Medical Entomology 1994; 31: 880-886.
- 516 28. Humair PF, Rais O, Gern L Transmission of *Borrelia afzelii* from *Apodemus* mice  
517 and *Clethrionomys* voles to *Ixodes ricinus* ticks: differential transmission pattern  
518 and overwintering maintenance. Parasitology 1999; 118: 33-42.
- 519 29. Tschirren B, Andersson M, Scherman K, Westerdahl H, Mittl PRE, Raberg L  
520 Polymorphisms at the innate immune receptor TLR2 are associated with *Borrelia*  
521 infection in a wild rodent population. Proceedings of the Royal Society B-  
522 Biological Sciences 2013; 280: 20130364.
- 523 30. Gomez-Chamorro A Immunoecology of a rodent reservoir host of the Lyme disease  
524 pathogen: the bank vole – *Borrelia afzelii* model: University of Neuchâtel; 2018.
- 525 31. Belli A, Sarr A, Rais O, Rego ROM, Voordouw MJ Ticks infected via co-feeding  
526 transmission can transmit Lyme borreliosis to vertebrate hosts. Scientific Reports  
527 2017; 7: 5006.
- 528 32. Jacquet M, Durand J, Rais O, Voordouw MJ Strain-specific antibodies reduce co-  
529 feeding transmission of the Lyme disease pathogen, *Borrelia afzelii*.  
530 Environmental Microbiology 2016; 18: 833-845.
- 531 33. Genné D, Sarr A, Gomez-Chamorro A, Durand J, Cayol C, Rais O, et al. Competition  
532 between strains of *Borrelia afzelii* inside the rodent host and the tick vector.  
533 Proceedings of the Royal Society B: Biological Sciences 2018; 285.
- 534 34. Tsao J Reviewing molecular adaptations of Lyme borreliosis spirochetes in the  
535 context of reproductive fitness in natural transmission cycles. Veterinary Research  
536 (Paris) 2009; 40.
- 537 35. Brisson D, Drecktrah D, Eggers C, Samuels DS Genetics of *Borrelia burgdorferi*.  
538 Annual Review of Genetics 2012; 46: 515-536.

- 539 36. Kallio ER, Poikonen A, Vaheri A, Vapalahti O, Henttonen H, Koskela E, et al.  
540 Maternal antibodies postpone hantavirus infection and enhance individual  
541 breeding success. *Proc Biol Sci* 2006; 273: 2771-2776.
- 542 37. Voordouw MJ, Lachish S, Dolan MC The Lyme disease pathogen has no effect on  
543 the survival of its rodent reservoir host. *Plos One* 2015; 10.
- 544 38. Randolph SE, Miklisova D, Lysy J, Rogers DJ, Labuda M Incidence from  
545 coincidence: patterns of tick infestations on rodents facilitate transmission of tick-  
546 borne encephalitis virus. *Parasitology* 1999; 118: 177-186.
- 547 39. Talleklint L, Jaenson TGT, Mather TN Seasonal variation in the capacity of the bank  
548 vole to infect larval ticks (Acari, Ixodidae) with the Lyme disease spirochete,  
549 *Borrelia burgdorferi*. *Journal of Medical Entomology* 1993; 30: 812-815.
- 550 40. Grimm D, Tilly K, Byram R, Steward PE, Krum JG, Bueschel DM, et al. Outer-  
551 surface protein C of the Lyme disease spirochete: a protein induced in ticks for  
552 infection of mammals. *Proceedings of the National Academy of Sciences of the*  
553 *United States of America* 2004; 101: 3142-3147.
- 554 41. Tilly K, Krum JG, Bestor A, Jewett MW, Grimm D, Bueschel D, et al. *Borrelia*  
555 *burgdorferi* OspC protein required exclusively in a crucial early stage of  
556 mammalian infection. *Infection and Immunity* 2006; 74: 3554-3564.
- 557 42. Tilly K, Bestor A, Jewett MW, Rosa P Rapid clearance of Lyme disease spirochetes  
558 lacking OspC from skin. *Infection and Immunity* 2007; 75: 1517-1519.
- 559 43. Rogovskyy AS, Bankhead T Bacterial heterogeneity is a requirement for host  
560 superinfection by the Lyme disease spirochete. *Infection and Immunity* 2014; 82:  
561 4542-4552.
- 562 44. Tonetti N, Voordouw MJ, Durand J, Monnier S, Gern L Genetic variation in  
563 transmission success of the Lyme borreliosis pathogen *Borrelia afzelii*. *Ticks and*  
564 *Tick-Borne Diseases* 2015; 6: 334-343.
- 565 45. Baranton G, Seinost G, Theodore G, Postic D, Dykhuizen D Distinct levels of genetic  
566 diversity of *Borrelia burgdorferi* are associated with different aspects of  
567 pathogenicity. *Research in Microbiology* 2001; 152: 149-156.  
568
- 569



570 **Supporting Information Legends**

571

572 The file titled “**Supporting information MatAb\_v14.docx**” contains the raw data from

573 this study and nine sections that contain additional results.

574

575

576 FIGURES

577

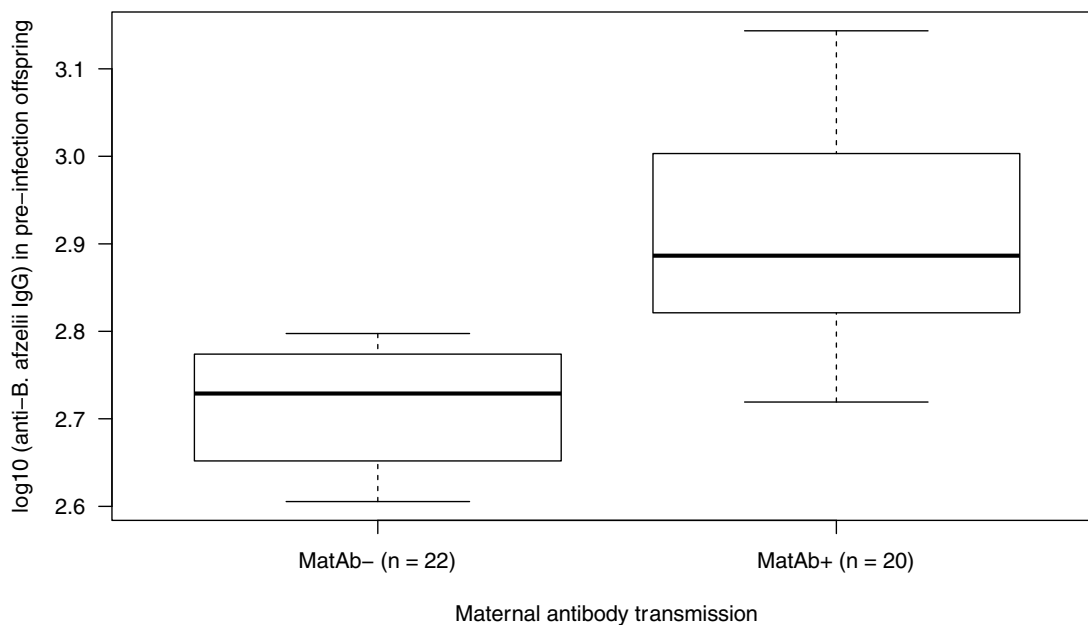

578

579

580 Figure 1. The maternally transmitted *B. afzelii*-specific IgG antibody response was  
581 significantly higher in the MatAb+ offspring (n = 20) than the MatAb- offspring (n = 22).  
582 The MatAb- and the MatAb+ are the offspring of 7 uninfected control mothers and 6 *B.*  
583 *afzelii*-infected mothers, respectively. The strength of the *B. afzelii*-specific maternal IgG  
584 antibody response was measured using a commercial Lyme borreliosis ELISA. Shown  
585 are the medians (black line), the 25th and 75th percentiles (edges of the box), the  
586 minimum and maximum values (whiskers), and the outliers (circles).

587

588

589

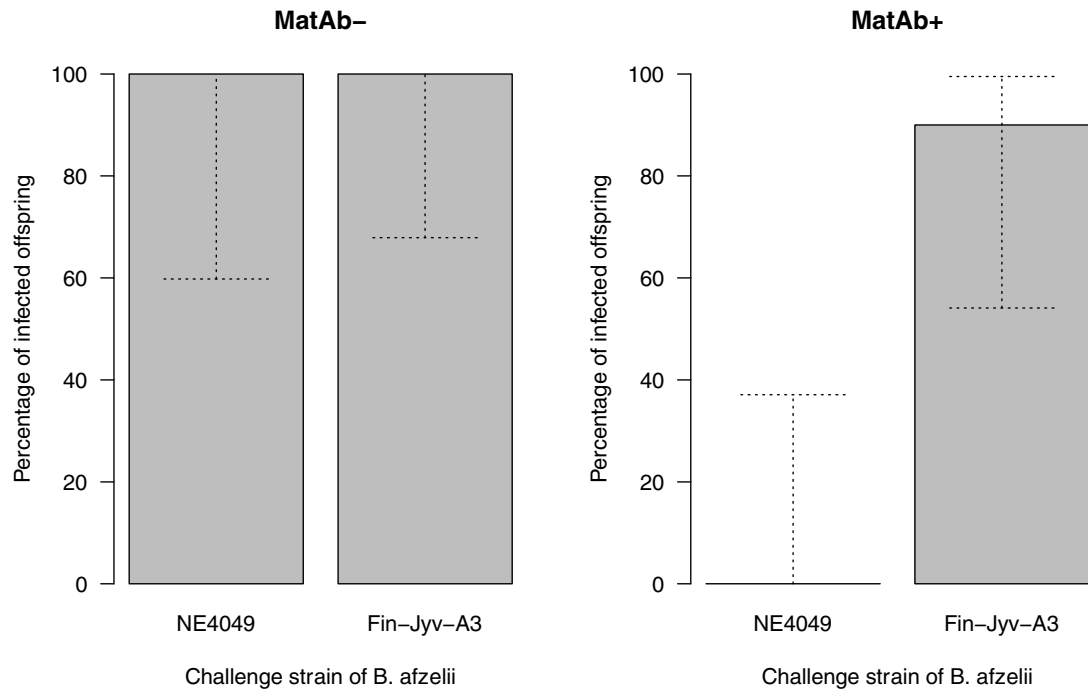

590

591

592 Figure 2. The percentage of infected offspring depends on the maternal antibody status  
593 and the challenge strain. The MatAb- (left panel) and MatAb+ (right panel) refer to the  
594 offspring from the uninfected control mothers and the mothers infected with *B. afzelii*  
595 strain NE4049, respectively. The offspring were challenged via tick bite with either *B.*  
596 *afzelii* strain NE4049 or *B. afzelii* strain Fin-Jyv-A3. The MatAb- offspring were equally  
597 susceptible to both strains. The MatAb+ offspring were protected against the maternal  
598 strain (NE4049) but not the new strain (Fin-Jyv-A3). The grey solid bars show the means  
599 and the stippled bars show the 95% confidence intervals.

600

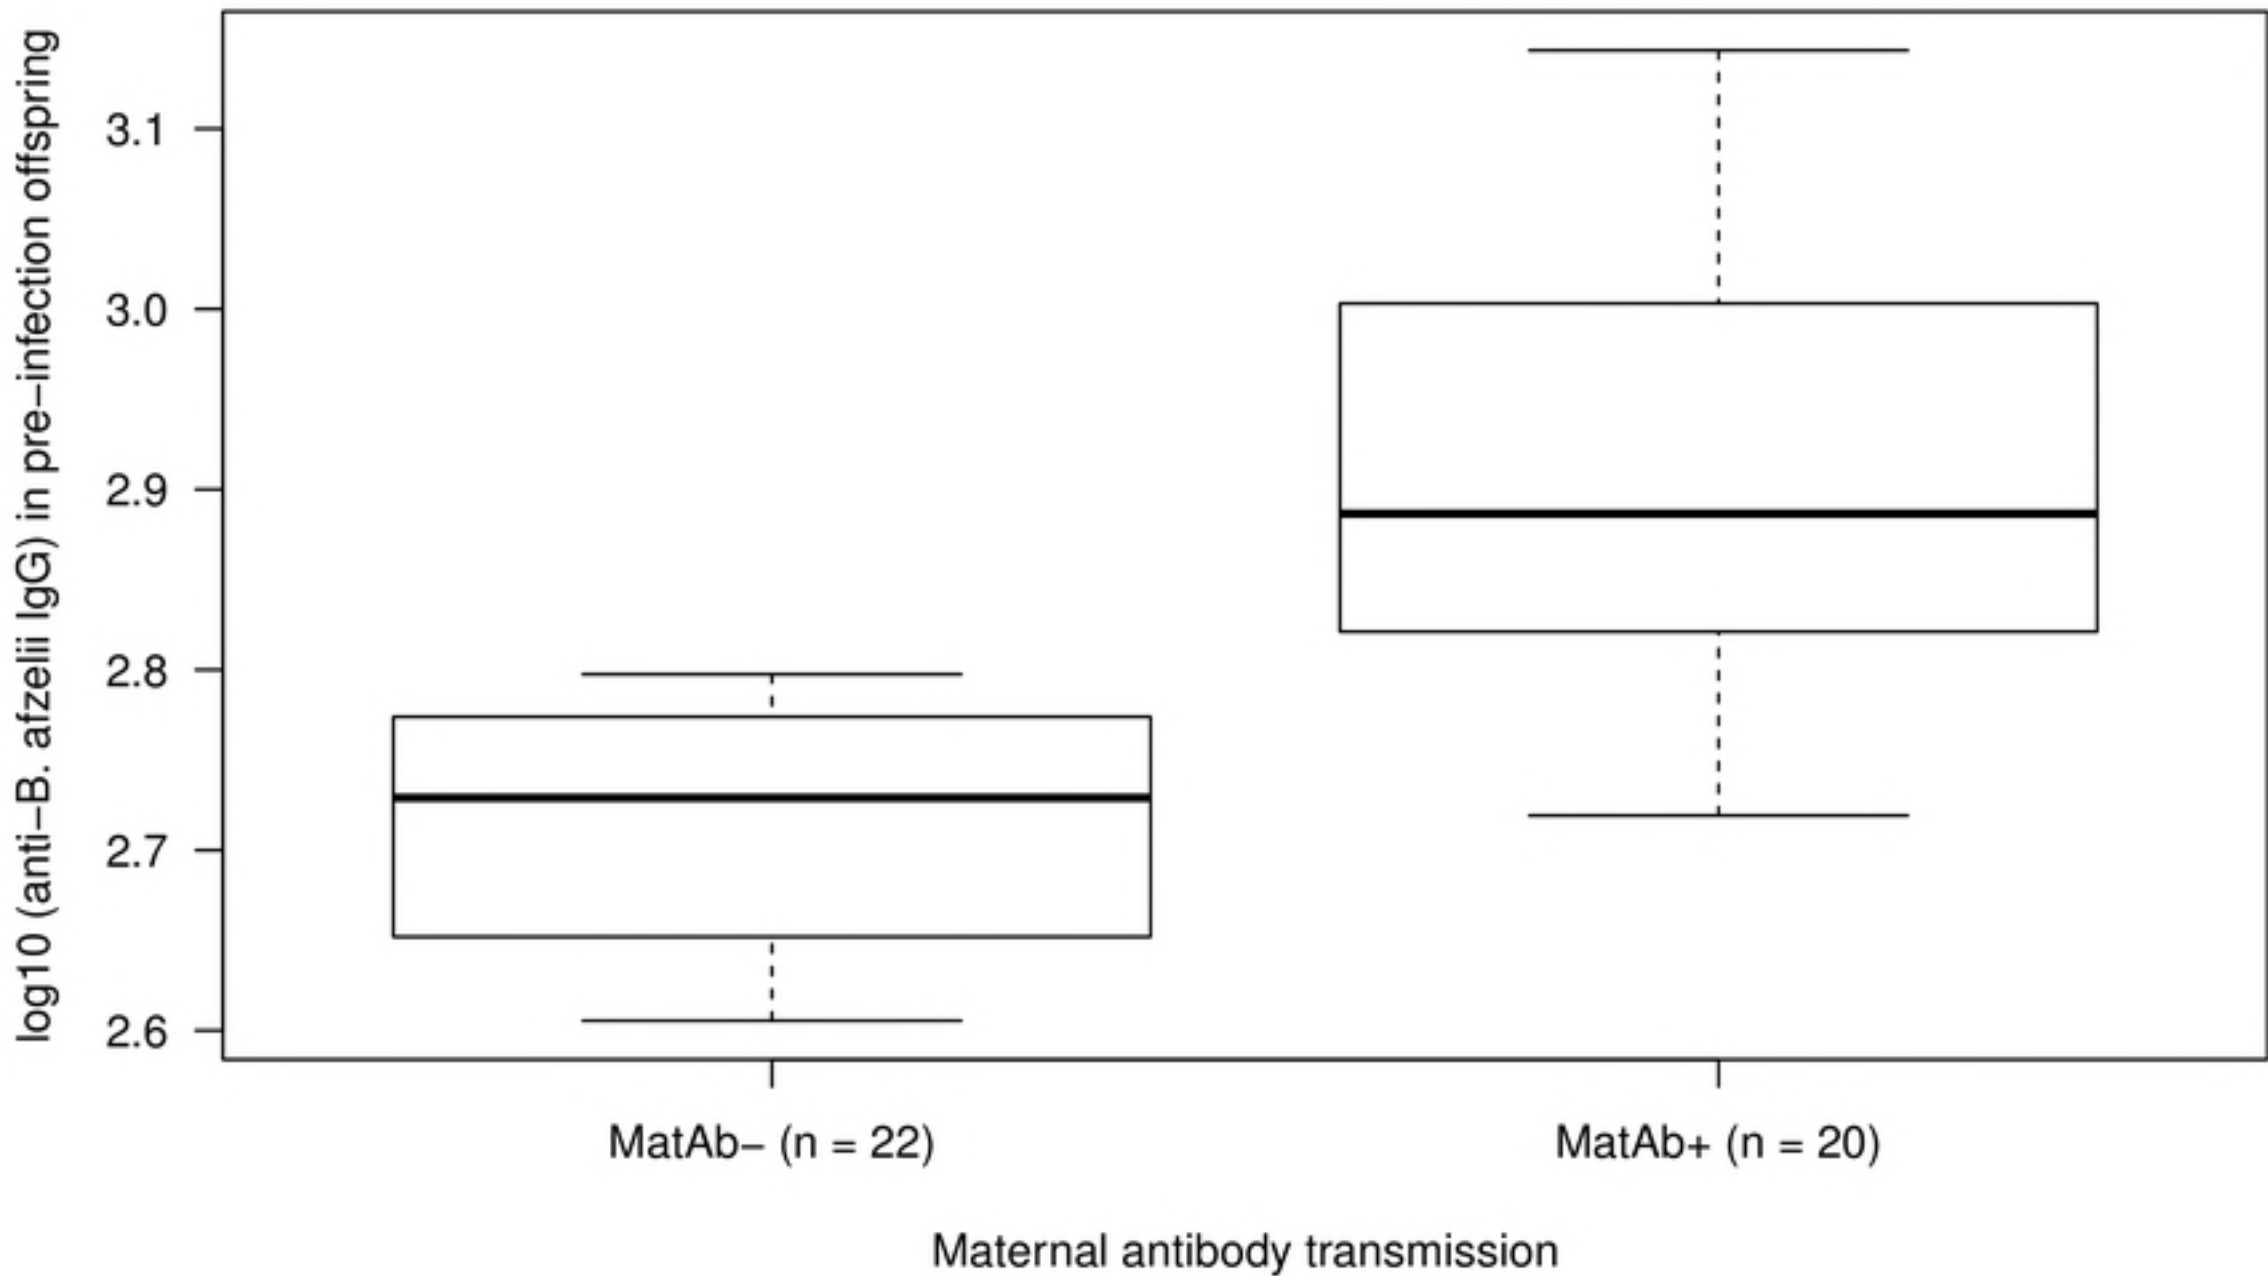

Figure 1

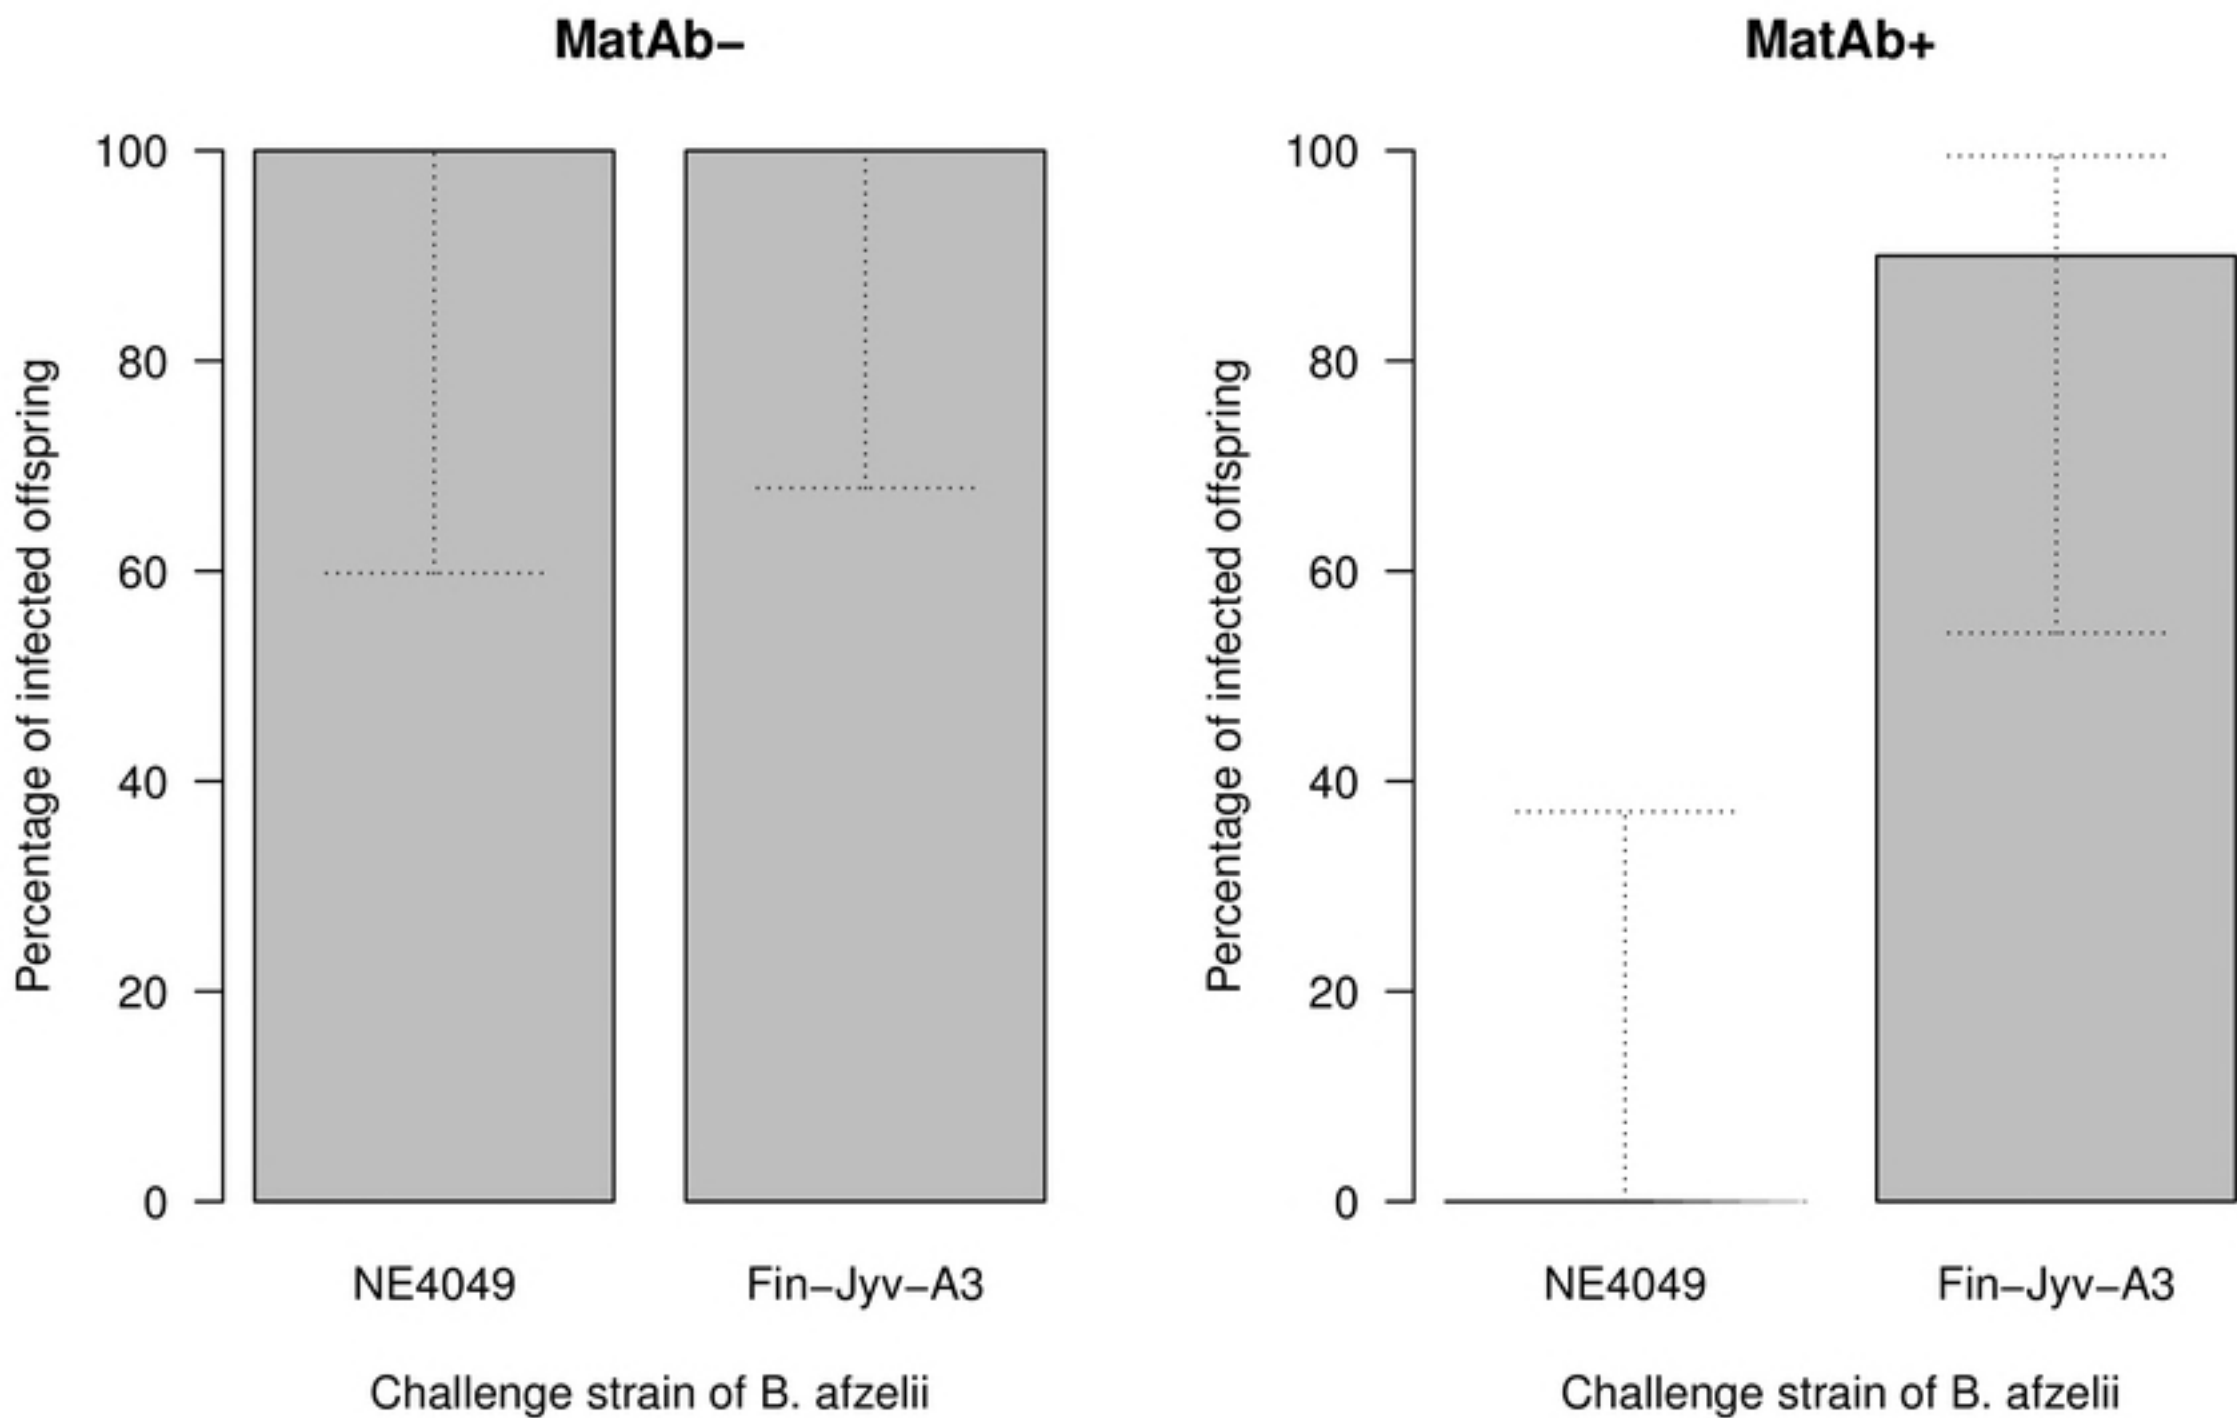

Figure 2
